# Supplementary material for: Association between Serum Insulin-Like Growth Factor-1 and Neurological Severity in Acute Ischemic Stroke
Source: PubMed Central journal article supplement — J Clin Neurol. 2021 Mar 18;17(2):206–12. doi: 10.3988/jcn.2021.17.2.206 (PMC8053552; doi:10.3988/jcn.2021.17.2.206), 2021-03-18
Supplement: jcn-17-206-s001.pdf [file jcn-17-206-s001.pdf]

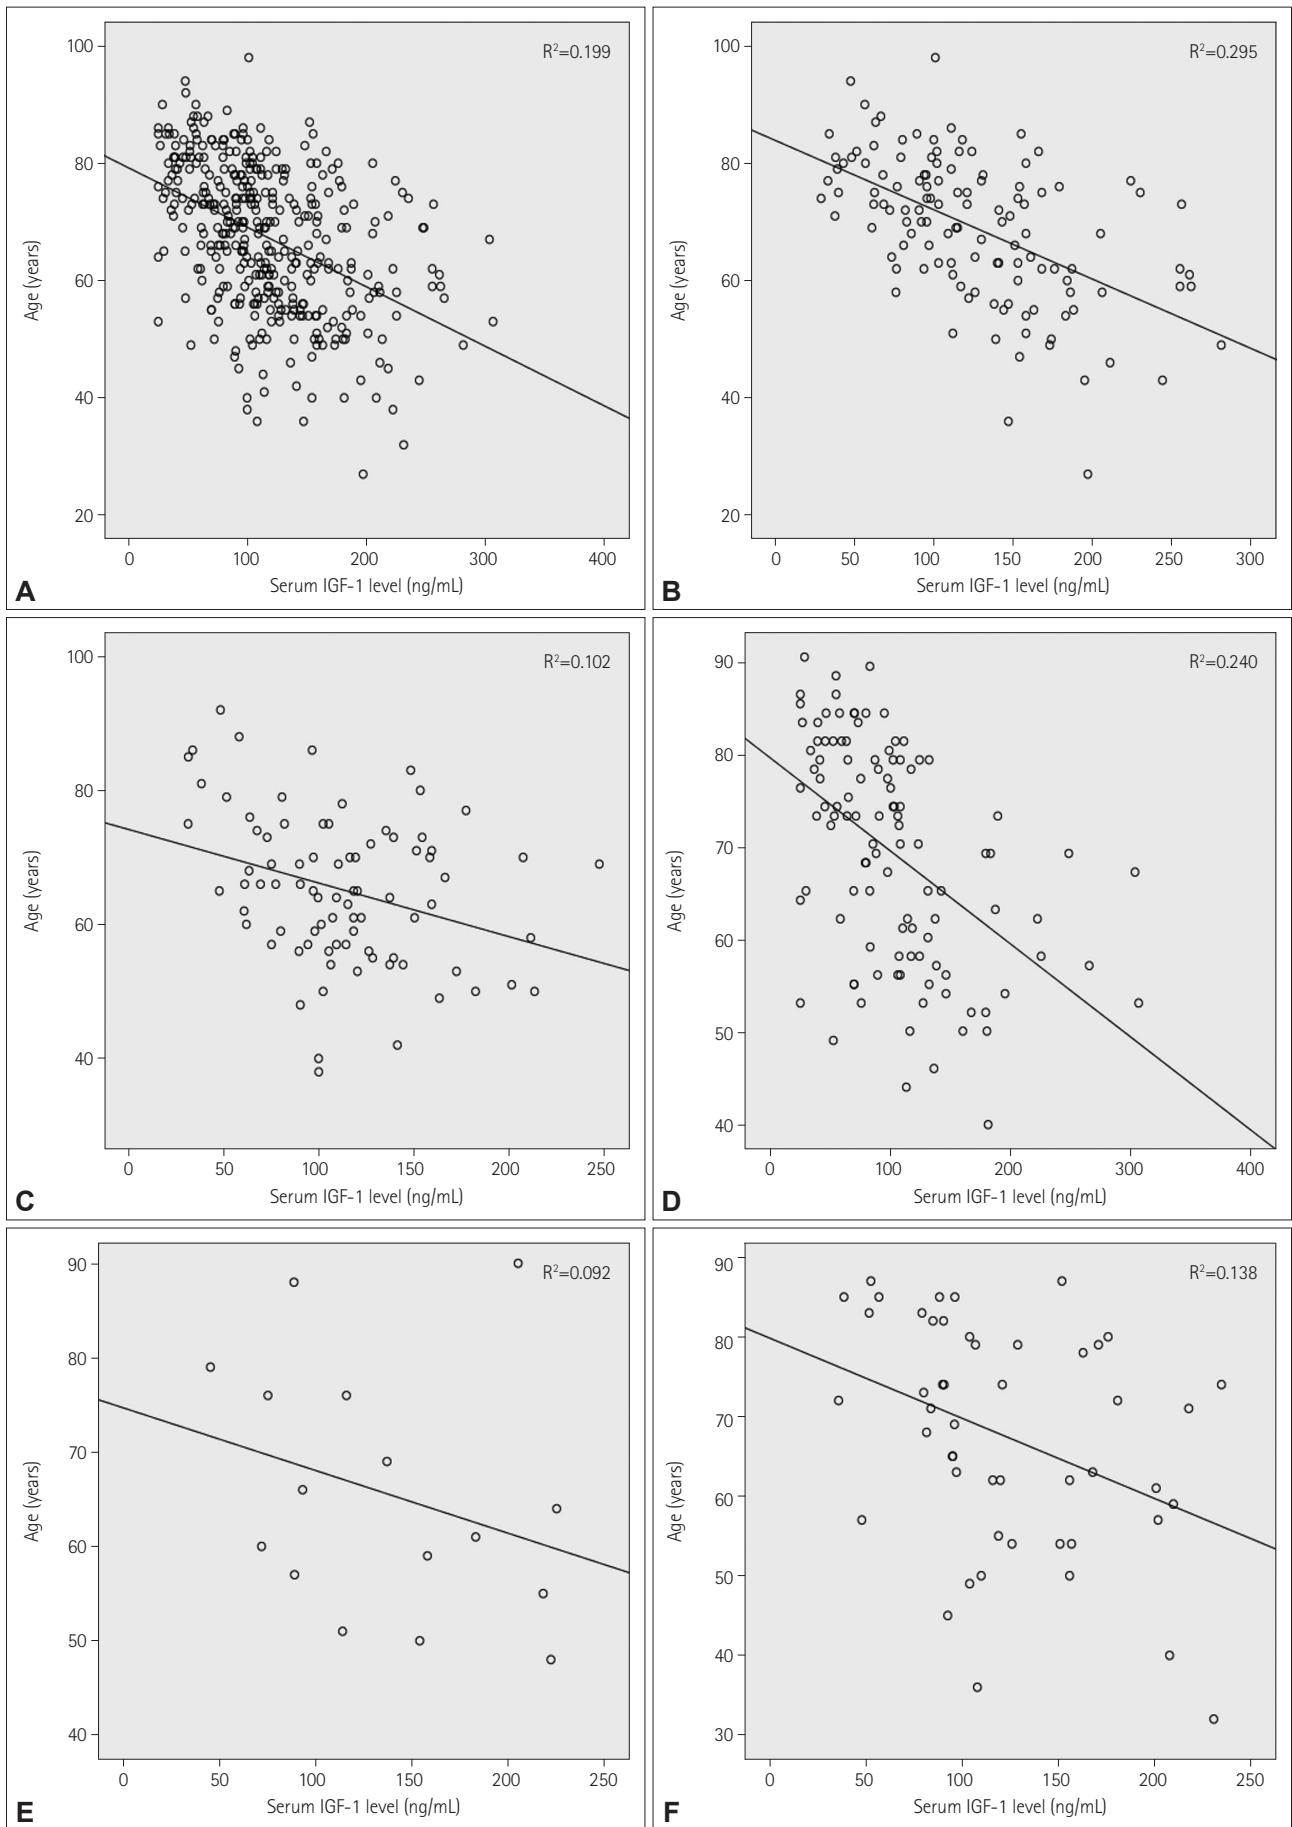

**Supplementary Fig. 1.** Correlation between serum IGF-1 level and age according to stroke subtype: all patients (A), and in patients with large-artery atherosclerosis (B), small-vessel occlusion (C), cardioembolism (D), stroke of other determined etiology (E), and stroke of undetermined etiology (F). IGF-1: insulin-like growth factor-1.
