# Supplementary material for: Association between Serum Insulin-Like Growth Factor-1 and Neurological Severity in Acute Ischemic Stroke
Source: PubMed Central journal article supplement — J Clin Neurol. 2021 Mar 18;17(2):206–12. doi: 10.3988/jcn.2021.17.2.206 (PMC8053552; doi:10.3988/jcn.2021.17.2.206), 2021-03-18
Supplement: jcn-17-206-s002.pdf [file jcn-17-206-s002.pdf]

**Supplementary Table 1.** Initial National Institutes of Health Stroke Scale score based on quartiles of serum IGF-1 levels in patients without chronic kidney disease ( $n=337$ )

| Serum IGF-1 | OR [95% CI]      | <i>p</i> |
|-------------|------------------|----------|
| Model 1     |                  | <0.001   |
| Q1          | Reference        |          |
| Q2          | 0.80 [0.43–1.46] | 0.463    |
| Q3          | 0.31 [0.16–0.59] | <0.001   |
| Q4          | 0.37 [0.20–0.71] | 0.003    |
| Model 2     |                  | <0.001   |
| Q1          | Reference        |          |
| Q2          | 0.80 [0.73–1.46] | 0.463    |
| Q3          | 0.31 [0.16–0.59] | <0.001   |
| Q4          | 0.37 [0.20–0.71] | 0.003    |
| Model 3     |                  | 0.001    |
| Q1          | Reference        |          |
| Q2          | 0.94 [0.48–1.84] | 0.850    |
| Q3          | 0.31 [0.15–0.64] | 0.001    |
| Q4          | 0.38 [0.19–0.78] | 0.009    |

Model 1: crude OR; model 2: model 1 adjusted for age and sex; model 3: model 2 adjusted for body mass index, Trial of Org 10172 in Acute Stroke Treatment (TOAST) classification, atrial fibrillation, smoking, white blood cell count, and high-sensitivity C-reactive protein.  
 CI: confidence interval, IGF-1: insulin-like growth factor-1, OR: odds ratio.
