# Supplementary material for: Association between Serum Insulin-Like Growth Factor-1 and Neurological Severity in Acute Ischemic Stroke
Source: PubMed Central journal article supplement — J Clin Neurol. 2021 Mar 18;17(2):206–12. doi: 10.3988/jcn.2021.17.2.206 (PMC8053552; doi:10.3988/jcn.2021.17.2.206), 2021-03-18
Supplement: jcn-17-206-s003.pdf [file jcn-17-206-s003.pdf]

**Supplementary Table 2.** Initial National Institutes of Health Stroke Scale score based on quartiles of serum IGF-1 levels for the different subtypes of ischemic stroke

| Serum IGF-1                  | Crude OR [95% CI] | <i>p</i> |
|------------------------------|-------------------|----------|
| Large-artery atherosclerosis |                   |          |
| Q1                           | Reference         | 0.12     |
| Q2                           | 1.41 [0.15–4.43]  | 0.56     |
| Q3                           | 0.55 [0.19–1.58]  | 0.27     |
| Q4                           | 0.39 [0.14–1.08]  | 0.07     |
| Small-vesselocclusion        |                   |          |
| Q1                           | Reference         | 0.59     |
| Q2                           | 2.28 [0.36–14.31] | 0.38     |
| Q3                           | 0.61 [0.09–4.30]  | 0.62     |
| Q4                           | 1.53 [0.19–12.40] | 0.69     |
| Cardioembolism               |                   |          |
| Q1                           | Reference         | 0.40     |
| Q2                           | 0.56 [0.21–1.47]  | 0.24     |
| Q3                           | 0.39 [0.13–1.11]  | 0.08     |
| Q4                           | 0.71 [0.22–2.31]  | 0.57     |

CI: confidence interval, IGF-1: insulin-like growth factor-1, OR: odds ratio.
