# Supplementary material for: Association between Serum Insulin-Like Growth Factor-1 and Neurological Severity in Acute Ischemic Stroke
Source: PubMed Central journal article supplement — J Clin Neurol. 2021 Mar 18;17(2):206–12. doi: 10.3988/jcn.2021.17.2.206 (PMC8053552; doi:10.3988/jcn.2021.17.2.206), 2021-03-18
Supplement: jcn-17-206-s004.pdf [file jcn-17-206-s004.pdf]

**Supplementary Table 3.** Association between serum IGF-1 level and initial stroke severity

| Serum IGF-1 | OR [95% CI]      | <i>p</i> |
|-------------|------------------|----------|
| Model 1     |                  |          |
| Q1          | Reference        | <0.005   |
| Q2          | 0.81 [0.45–1.43] | 0.46     |
| Q3          | 0.35 [0.19–0.64] | <0.005   |
| Q4          | 0.47 [0.26–0.85] | 0.01     |
| Model 2     |                  |          |
| Q1          | Reference        | 0.04     |
| Q2          | 0.89 [0.49–1.60] | 0.69     |
| Q3          | 0.42 [0.22–0.81] | 0.01     |
| Q4          | 0.60 [0.32–1.15] | 0.13     |
| Model 3     |                  |          |
| Q1          | Reference        | <0.005   |
| Q2          | 0.88 [0.47–1.65] | 0.69     |
| Q3          | 0.36 [0.18–0.69] | <0.005   |
| Q4          | 0.43 [0.23–0.81] | 0.01     |

Model 1: crude OR; model 2: model 1 adjusted for age and sex; model 3: model 2 adjusted for body mass index, Trial of Org 10172 in Acute Stroke Treatment (TOAST) classification, atrial fibrillation, smoking, white blood cell count, and high-sensitivity C-reactive protein. CI: confidence interval, IGF-1: insulin-like growth factor-1, OR: odds ratio.
