# Supplementary material for: Association between Serum Insulin-Like Growth Factor-1 and Neurological Severity in Acute Ischemic Stroke
Source: PubMed Central journal article supplement — J Clin Neurol. 2021 Mar 18;17(2):206–12. doi: 10.3988/jcn.2021.17.2.206 (PMC8053552; doi:10.3988/jcn.2021.17.2.206), 2021-03-18
Supplement: jcn-17-206-s005.pdf [file jcn-17-206-s005.pdf]

**Supplementary Table 4.** Association between serum IGF-1 level and 3-month functional outcome

| Serum IGF-1 | OR [95% CI]      | <i>p</i> |
|-------------|------------------|----------|
| Model 1     |                  | 0.191    |
| Q1          | Reference        |          |
| Q2          | 1.31 [0.73–2.35] | 0.371    |
| Q3          | 1.31 [0.73–2.38] | 0.368    |
| Q4          | 1.97 [1.07–3.64] | 0.030    |
| Model 2     |                  | 0.584    |
| Q1          | Reference        |          |
| Q2          | 0.95 [0.51–1.78] | 0.875    |
| Q3          | 0.65 [0.33–1.27] | 0.206    |
| Q4          | 0.86 [0.42–1.74] | 0.673    |
| Model 3     |                  | 0.172    |
| Q1          | Reference        |          |
| Q2          | 0.74 [0.34–1.64] | 0.460    |
| Q3          | 0.36 [0.15–0.84] | 0.019    |
| Q4          | 0.60 [0.24–1.49] | 0.269    |

Model 1: crude OR; model 2: model 1 adjusted for age and sex; model 3: model 2 adjusted for body mass index, Trial of Org 10172 in Acute Stroke Treatment (TOAST) classification, diabetes mellitus, previous stroke, smoking, initial National Institutes of Health Stroke Scale score, white blood cell count, initial glucose level, and high-sensitivity C-reactive protein.

CI: confidence interval, IGF-1: insulin-like growth factor-1, OR: odds ratio.
